# Supplementary material for: A novel 2,5-furandicarboxylic acid-based bis(cyclic carbonate) for the synthesis of biobased non-isocyanate polyurethanes
Source: Royal Society of Chemistry journal article supplement (doi:10.1039/c6ra25045a), 2016-12-22
Supplement: c6ra25045a1.pdf [file c6ra25045a1.pdf]

**Supporting Information for**

**A novel 2,5-furandicarboxylic acid-based bis(cyclic carbonate) for the synthesis of biobased non-isocyanate polyurethanes**

Lu Zhang<sup>a</sup>, Xiaolan Luo<sup>a</sup>, Yusheng Qin<sup>a,b\*</sup> and Yebo Li<sup>a\*</sup>

<sup>a</sup> Department of Food, Agricultural and Biological Engineering  
Ohio Agricultural Research and Development Center  
The Ohio State University  
1680 Madison Ave, Wooster, OH 44691-4096, USA  
E-mail: li.851@osu.edu; Tel: +1-330-263-3855.

<sup>b</sup> Key Laboratory of Polymer Ecomaterials  
Changchun Institute of Applied Chemistry  
Chinese Academy of Sciences  
Changchun 130022, PR China.  
E-mail: ysqin@ciac.ac.cn; Tel: +86-0431-85262567.

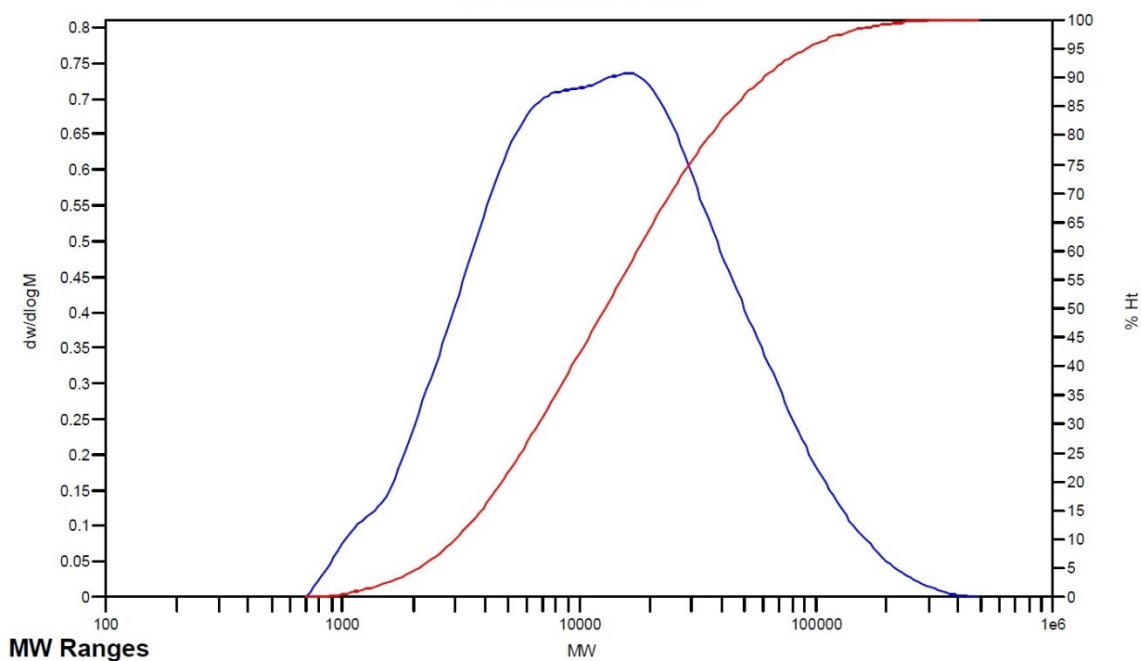

Figure S1. Molecular weight (MW) distribution of the PHU synthesized from at 1,6-hexanediamine at 180°C determined by GPC (blue curve: differential MW distribution, red curve: integral MW distribution,  $M_n=7,000$  g/mol, PDI=3.5).

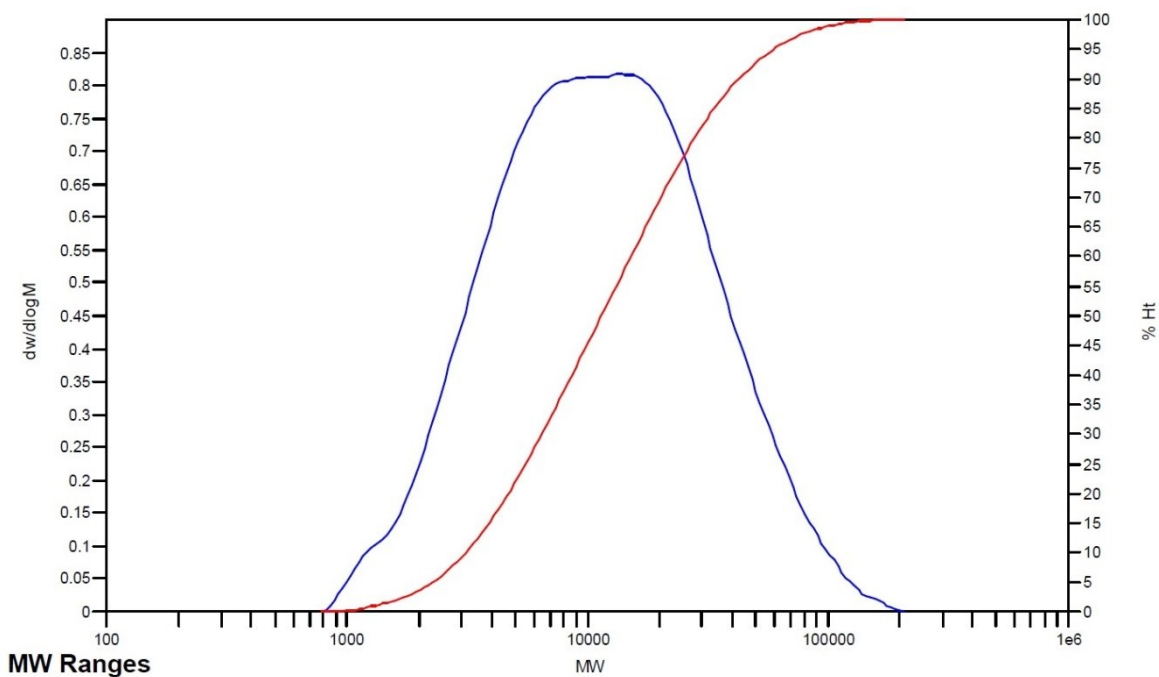

Figure S2. MW distribution of the PHU synthesized from at 1,8-diaminooctane at 180°C determined by GPC (blue curve: differential MW distribution, red curve: integral MW distribution,  $M_n=7,000$  g/mol, PDI=2.6).

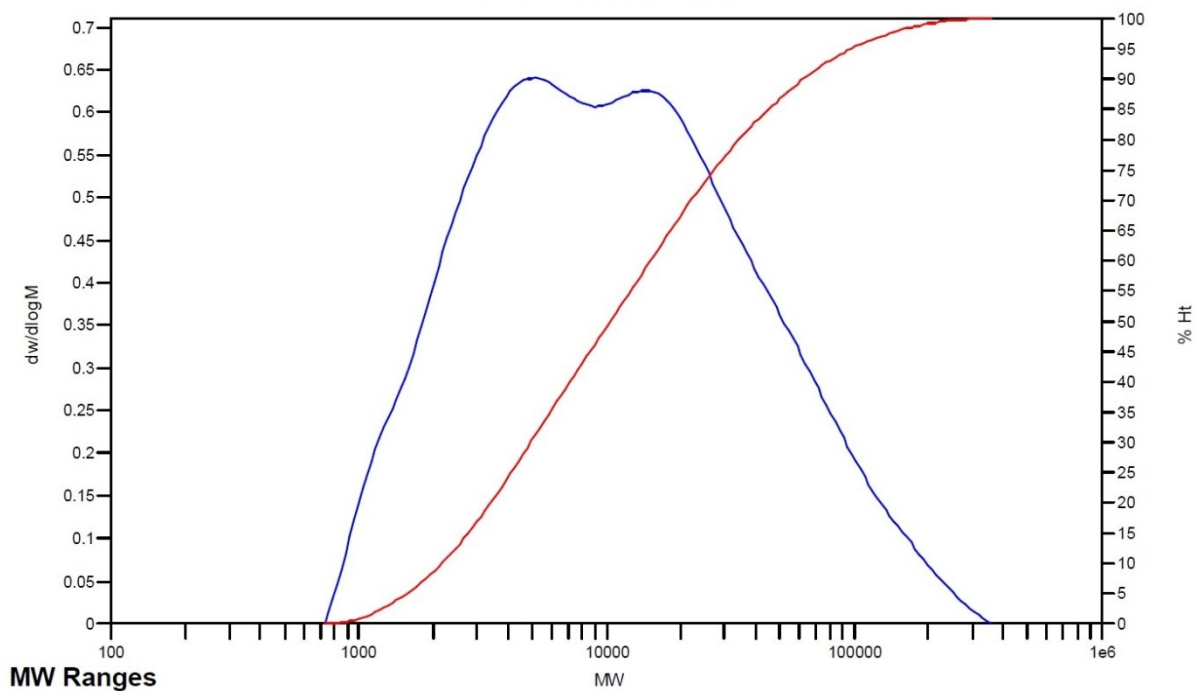

Figure S3. MW distribution of the PHU synthesized from at isophorondiamine at 180°C determined by GPC (blue curve: differential MW distribution, red curve: integral MW distribution,  $M_n=5,500$  g/mol, PDI=4.3).
